# Supplementary material for: Fructans from Agave tequilana with a Lower Degree of Polymerization Prevent Weight Gain, Hyperglycemia and Liver Steatosis in High-Fat Diet-Induced Obese Mice
Source: PubMed Central journal article supplement (PMC5116042; doi:10.1007/s11130-016-0578-x), 2016-09-27
Supplement: 11130_2016_578_MOESM1_ESM.pdf [file 11130_2016_578_MOESM1_ESM.pdf]

**Supplementary file 1: Table.** Body weight, body fat, lipid profile, liver enzymes and glucose in C57BL/6 mice fed a SD or HFD for 8 weeks

|                           | <b>Non-obese</b>              | <b>Obese</b>                   | <b>p value</b> |
|---------------------------|-------------------------------|--------------------------------|----------------|
|                           | <b>Standard Diet<br/>(SD)</b> | <b>High-Fat Diet<br/>(HFD)</b> |                |
| Final body weight (g)     | 27 ± 0.6                      | 36.7 ± 0.8                     | 0.006          |
| Gain weight (g)           | 6.16 ± 0.7                    | 15.9 ± 0.8                     | 0.0001         |
| Fat Mass (g)              | 0.34 ± 0.03                   | 4.32 ± 0.2                     | 0.0001         |
| Epididymal (g)            | 0.2 ± 0.02                    | 1.86 ± 0.1                     | 0.001          |
| Visceral (g)              | 0.08 ± 0.02                   | 0.68 ± 0.03                    | 0.001          |
| Subcutaneous (g)          | 0.06 ± 0.01                   | 1.78 ± 0.2                     | 0.003          |
| Triglycerides (mg/dl)     | 94 ± 6.6                      | 196 ± 60.4                     | 0.01           |
| Total cholesterol (mg/dl) | 82 ± 14.5                     | 147.7 ± 8.5                    | 0.01           |
| HDL (mg/dl)               | 54 ± 4.0                      | 71.3 ± 10.9                    | NS             |
| LDL (mg/dl)               | 18.7 ± 3.7                    | 37 ± 10.7                      | NS             |
| VLDL (mg/dl)              | 18.7 ± 1.3                    | 39.3 ± 11.9                    | NS             |
| Glucose (mg/dl)           | 110.6 ± 8.1                   | 171 ± 5.9                      | 0.0002         |
| AST (U/l)                 | 64.7 ± 6.9                    | 159 ± 9.6                      | 0.01           |
| ALT (U/l)                 | 50.3 ± 2.8                    | 64.7 ± 9.7                     | NS             |

Mean ± SD, in growth parameters n=10 and biochemical parameters n=6. Abbreviations: ALT, alanine aminotransferase; AST, aspartate aminotransferase; HFD, High-Fat Diet; HDL, high-density lipoproteins; LDL, low-density lipoproteins; SD, standard-Diet; VLDL, Very low-density lipoproteins
